# Supplementary material for: Effects of low pH and feeding on calcification rates of the cold-water coral Desmophyllum dianthus
Source: PeerJ journal article supplement (doi:10.7717/peerj.8236), 2020-01-02
Supplement: SUPPL_MATERIAL_revised.pdf [file SUPPL_MATERIAL_revised.pdf]

## Supplementary material

Table S1. Estimates of abundance and concentration of food particles expressed as particles L<sup>-1</sup> (*Cyclops*, *Artemia* and *Mysis*) in 10L aquaria. Concentrated food was previously resuspended in 40mL of seawater. Sample size = 3mL, N = 6.

|                | <b>Abundance</b> | <b>SD</b> | <b>SE</b> | <b>Density</b> |
|----------------|------------------|-----------|-----------|----------------|
| <i>Cyclops</i> | 915              | 79        | 32        | 91.5           |
| <i>Artemia</i> | 35               | 13        | 5         | 3.5            |
| <i>Mysis</i>   | 17               | 5         | 2         | 1.7            |
