# Supplementary material for: Effects of low pH and feeding on calcification rates of the cold-water coral Desmophyllum dianthus
Source: PeerJ. 2020 Jan 2;8:e8236. doi: 10.7717/peerj.8236 (PMC6942680; doi:10.7717/peerj.8236)
Supplement: Supplemental Information 1 [file peerj-08-8236-s001.xlsx]

## Sheet: INFO
				TREATMENT			WEIGHT CLASS
	AQ	Nº CORALS	SPECIMENS	FEED	pH
	1	6	R5, A3, A9, R9, B3n, C7	HF	8.1			g	N
	2	7	P9, R1, R8, A1, A2, B1, H7	HF	8.1		1	0-2g	25
	3	6	R2, A7, B4, B6, R4,A4	HF	8.1		2	2-4g	38
	4	6	S4, S7, B5n, C3, E5, F8	HF	7.8		3	4-8g	66
	5	7	R7, S1, S2, C2, D2, F5, I1	HF	7.8		4	>8g	23
	6	5	R3, S3, C9, E9, F3	HF	7.8
	7	6	S6, T2, D3, D8, G4n,D5	HF	7.5
	8	7	S5, S8, W9, B7, D6, G7, I7	HF	7.5
	9	6	T1, T3, D1, D7, F4, G5n	HF	7.5
	10	6	T7, C1, F6,F9, H8,U1	HF	7.2
	11	7	T9, U5, X2, O9, E8, H4, L4	HF	7.2
	12	6	P8, T5, U2, E1, E3, F2	HF	7.2
	13	6	U6, W1, E6, I9, L3, L8	LF	8.1
	14	7	U7, W4, X3, C4, G3, G6, I6	LF	8.1
	15	6	T6, U8, G1, G8, H2, I2	LF	8.1
	16	6	U4, Y1, B8, H1, J1, J4	LF	7.8
	17	7	U9, C8, W6, H9, J2, M2,X8n	LF	7.8
	18	6	W3, X7, H5, J3, J5, J6	LF	7.8
	19	6	W2, W7, E4n, I4, K1, K3	LF	7.5
	20	7	W5, Y3, O6, E7, H3, J9, K2	LF	7.5
	21	6	X5, Y5, I3, J7, J8, M3	LF	7.5
	22	6	X4, Y9, B2, K9, L2, L7	LF	7.2
	23	7	W8, X9, Y7, A8, I5, K6, L5n	LF	7.2
	24	7	X6, Y8, K4, K5, M4, Y7,H6	LF	7.2
	N	152		2	4
									152

## Sheet: GROWTH
				DRY WEIGHT (g)				CALCIFICATION RATE RESPECT TO T0 (mg CaCO3 g-1 d-1)			CALCIFICATION RATE BETWEEN PERIODS (mg CaCO3 g-1 d-1)
			Date	2015-05-14	2015-08-24	2015-12-21	2016-07-20
			Days	0	102	221	433	102	221	433	102	119	212
FEED	PH	AQ	CORAL_ID	T0	T1	T2	T3	T0-1	T0-2	T0-3	T0-1	T1-2	T2-3
HF	8.1	1	A3	7.20839	7.34358	7.56612	7.7894	0.183877	0.224558	0.186148	0.183877	0.259429	0.146107
HF	8.1	1	A9	7.71466	7.78294	7.85702	7.91288	0.0867675	0.0834945	0.0593385	0.0867675	0.080689	0.0341571
HF	8.1	1	B3n	3.66696	4.32032	4.562	4.91294	1.74681	1.10444	0.784729	1.74681	0.553841	0.451442
HF	8.1	1	C7	5.99006	6.05708	6.14704	6.20527	0.10969	0.11858	0.082975	0.10969	0.1262	0.0458585
HF	8.1	1	R5	2.09227	2.17541	2.33158	2.63781	0.389579	0.517564	0.602181	0.389579	0.627266	0.69039
HF	8.1	1	R9	11.493	11.5657	11.6196	11.6453	0.0620065	0.0498572	0.0306059	0.0620065	0.0394435	0.0105373
HF	8.1	2	A1	4.54849	4.58552	4.64864	4.74659	0.0798197	0.099632	0.100585	0.0798197	0.116614	0.101578
HF	8.1	2	A2	12.5807	12.8234	13.0952	13.3383	0.18912	0.185045	0.13906	0.18912	0.181553	0.0911215
HF	8.1	2	B1	3.66914	3.69461	3.7635	3.80978	0.0680438	0.116371	0.0885247	0.0680438	0.157794	0.0594963
HF	8.1	2	H7	2.19257	2.25108	2.41904	2.7192	0.261616	0.467376	0.554704	0.261616	0.643742	0.64574
HF	8.1	2	P9	6.62327	6.65565	6.67947	6.69359	0.0479226	0.0383903	0.0245198	0.0479226	0.0302197	0.0100605
HF	8.1	2	R1	6.31577	6.33463	6.36004	6.38823	0.0292888	0.0317231	0.026497	0.0292888	0.0338096	0.021049
HF	8.1	2	R8	1.48182	1.48177	1.4826	1.48161	-0.000347863	0.00238104	-0.000329361	-0.000347863	0.0047201	-0.00315483
HF	8.1	3	A4	8.3958	8.59211	9.00092	9.61522	0.229245	0.326128	0.335433	0.229245	0.409169	0.345133
HF	8.1	3	A7	7.38364	7.5153	7.73032	7.95352	0.174816	0.212453	0.178249	0.174816	0.244714	0.142593
HF	8.1	3	B4	1.33337	1.43412	1.57928	1.8614	0.740811	0.834512	0.914575	0.740811	0.914826	0.998037
HF	8.1	3	B6	1.36211	1.61081	1.8795	2.21621	1.79008	1.71876	1.44815	1.79008	1.65762	1.16605
HF	8.1	3	R2	3.20109	3.34403	3.48354	3.63467	0.437782	0.399263	0.312814	0.437782	0.366246	0.222696
HF	8.1	3	R4	3.12269	3.11877	3.12155	3.11921	-0.0123078	-0.00164493	-0.00257207	-0.0123078	0.00749464	-0.00353856
HF	7.8	4	B5n	0.955558	1.22495	1.30385	1.38704	2.76397	1.64929	1.04285	2.76397	0.693856	0.410654
HF	7.8	4	C3	5.82227	5.86999	5.91023	6.01567	0.0803443	0.0683565	0.0767107	0.0803443	0.0580812	0.0854197
HF	7.8	4	E5	7.18634	7.25439	7.16198	7.67721	0.0928269	-0.0153372	0.15775	0.0928269	-0.108049	0.338184
HF	7.8	4	F8	7.55178	7.50313	7.43097	7.36943	-0.0631539	-0.0723839	-0.055764	-0.0631539	-0.0802953	-0.0384385
HF	7.8	4	S4	2.00623	2.11987	2.29206	2.48673	0.555354	0.644685	0.553134	0.555354	0.721256	0.457696
HF	7.8	4	S7	11.1492	11.1563	11.1566	11.312	0.00626151	0.00300225	0.0337196	0.00626151	0.000208605	0.065741
HF	7.8	5	C2	11.0961	11.1423	11.1591	11.2378	0.0408389	0.0256906	0.0294881	0.0408389	0.0127064	0.0334467
HF	7.8	5	D2	11.2094	11.2029	11.1776	11.1847	-0.00570576	-0.0128424	-0.00509591	-0.00570576	-0.0189595	0.00297941
HF	7.8	5	F5	4.08638	4.22935	4.45581	4.73966	0.343018	0.409073	0.369213	0.343018	0.465692	0.327661
HF	7.8	5	I1	4.00685	4.04663	4.07253	4.24214	0.0973124	0.0741657	0.135613	0.0973124	0.0543258	0.19967
HF	7.8	5	R7	1.76298	1.82232	1.89605	2.19158	0.329991	0.341539	0.561456	0.329991	0.351438	0.790708
HF	7.8	5	S1n	6.11306	6.1328	6.14214	6.20981	0.0316736	0.0215254	0.0365547	0.0316736	0.012827	0.0522219
HF	7.8	5	S2	1.95016	1.98663	2.05896	2.3265	0.183342	0.252439	0.445674	0.183342	0.311665	0.647112
HF	7.8	6	C9	6.09894	6.12127	6.12411	6.14308	0.0358977	0.0186738	0.0167133	0.0358977	0.00391039	0.0146696
HF	7.8	6	E9	6.56728	6.60961	6.62868	6.62994	0.0631923	0.0423066	0.0220333	0.0631923	0.0244046	0.0008994
HF	7.8	6	F3n	3.95514	3.96987	3.93912	3.25241	0.0365126	-0.0183267	-0.410334	0.0365126	-0.0653317	-0.818983
HF	7.8	6	G2n	6.20007	6.21031	6.1624	6.26464	0.0162001	-0.0274924	0.0240523	0.0162001	-0.0649431	0.0777853
HF	7.8	6	R3	10.4153	10.326	10.5756	10.6947	-0.0840655	0.0696652	0.0619496	-0.0840655	0.201434	0.0539064
HF	7.8	6	S3	2.44256	2.43952	2.44252	2.43694	-0.0122232	-7.03434e-05	-0.00531924	-0.0122232	0.0103464	-0.010791
HF	7.5	7	D3	5.29978	5.21417	5.11479	5.03285	-0.158364	-0.157943	-0.116319	-0.158364	-0.157582	-0.0729284
HF	7.5	7	D5t	7.21063	7.09638	6.98074	6.98351	-0.155346	-0.144265	-0.0727447	-0.155346	-0.134766	0.00181153
HF	7.5	7	D8	1.10291	1.17193	1.23035	1.33945	0.613469	0.522832	0.495299	0.613469	0.445143	0.466598
HF	7.5	7	G4n	5.15892	6.50991	6.56109	6.71493	2.5674	1.22985	0.696572	2.5674	0.0833712	0.14066
HF	7.5	7	S6	6.34792	6.4172	6.59047	7.26295	0.106994	0.17289	0.332901	0.106994	0.229373	0.499704
HF	7.5	7	T2	2.6802	2.87203	3.2387	3.99884	0.701679	0.942887	1.13624	0.701679	1.14964	1.33781
HF	7.5	8	B7	14.9549	14.7934	14.6225	14.5942	-0.105815	-0.100555	-0.0556885	-0.105815	-0.0960459	-0.00891752
HF	7.5	8	D6	4.68764	4.71449	4.79498	5.06259	0.0561462	0.103613	0.184728	0.0561462	0.144298	0.269287
HF	7.5	8	G7	5.06691	5.01882	4.91835	4.86262	-0.0930543	-0.132669	-0.093114	-0.0930543	-0.166624	-0.0518799
HF	7.5	8	I7	1.42568	1.41956	1.40181	1.47325	-0.0421123	-0.0757625	0.0770568	-0.0421123	-0.104605	0.236364
HF	7.5	8	S5	7.30025	7.24614	7.16198	7.1811	-0.0726581	-0.085698	-0.0376917	-0.0726581	-0.0968751	0.0123526
HF	7.5	8	S8	2.38446	2.32858	2.62723	2.84328	-0.229736	0.460698	0.4444	-0.229736	1.0525	0.427409
HF	7.5	8	W9	2.17313	2.31953	2.53482	3.14731	0.660456	0.7531	1.03529	0.660456	0.832509	1.32946
HF	7.5	9	D1	4.31043	4.24925	4.19222	4.32934	-0.139144	-0.124098	0.0101292	-0.139144	-0.111201	0.150054
HF	7.5	9	D7	2.38216	2.44744	2.58353	2.76148	0.268651	0.382498	0.367745	0.268651	0.480081	0.352365
HF	7.5	9	F4	3.53601	3.63664	4.05755	3.93989	0.279001	0.66739	0.263785	0.279001	1.00029	-0.156954
HF	7.5	9	G5n	2.83383	3.61743	3.68717	4.04819	2.71096	1.36258	0.989661	2.71096	0.206816	0.600914
HF	7.5	9	T1	9.28288	9.22517	9.12183	9.16792	-0.0609536	-0.078504	-0.0286012	-0.0609536	-0.0935471	0.0234202
HF	7.5	9	T3	5.68736	5.64405	5.70168	6.11209	-0.0746543	0.0113959	0.17247	-0.0746543	0.0851532	0.340382
HF	7.2	10	C1	22.6912	21.8353	20.7515	19.3023	-0.369806	-0.386786	-0.344913	-0.369806	-0.401341	-0.301262
HF	7.2	10	F6	5.45216	5.48927	5.53042	5.74667	0.0667337	0.0649498	0.124752	0.0667337	0.0634207	0.187092
HF	7.2	10	F9n	7.44807	7.27725	6.95971	7.00934	-0.224854	-0.296692	-0.13604	-0.224854	-0.358268	0.0314315
HF	7.2	10	H8	3.06145	2.91905	2.76711	2.55347	-0.456032	-0.43505	-0.383209	-0.456032	-0.417066	-0.329167
HF	7.2	10	T7	5.61568	5.51078	5.28702	5.19743	-0.183137	-0.264821	-0.172008	-0.183137	-0.334836	-0.0752546
HF	7.2	10	U1n	5.95367	5.65027	5.30604	6.54751	-0.499613	-0.492213	0.230353	-0.499613	-0.485871	0.983594
HF	7.2	11	E8	8.65038	8.38807	8.21118	7.91494	-0.297292	-0.229738	-0.196345	-0.297292	-0.171834	-0.161536
HF	7.2	11	H4	4.35767	4.40069	4.52607	4.30538	0.0967783	0.174857	-0.0277133	0.0967783	0.241781	-0.238883
HF	7.2	11	O9	2.56	2.39068	2.32677	2.14651	-0.648463	-0.412245	-0.373031	-0.648463	-0.209772	-0.332152
HF	7.2	11	L4n	4.72247	4.34706	4.12773	3.74978	-0.779359	-0.569862	-0.475682	-0.779359	-0.390294	-0.377504
HF	7.2	11	T9	11.8885	11.7099	11.567	11.3644	-0.147288	-0.122375	-0.101821	-0.147288	-0.10102	-0.0803947
HF	7.2	11	U5	3.29557	3.17544	3.1081	2.99649	-0.357376	-0.257404	-0.209589	-0.357376	-0.171713	-0.159744
HF	7.2	11	X2	0.840631	0.841081	0.825285	0.803134	0.00525674	-0.0825999	-0.103016	0.00525674	-0.157906	-0.124298
HF	7.2	12	E1	1.65335	1.69798	1.75565	2.02872	0.264666	0.279987	0.524332	0.264666	0.293119	0.779051
HF	7.2	12	E3n	2.91487	2.85181	2.66031	2.77127	-0.212104	-0.395166	-0.113779	-0.212104	-0.552077	0.179555
HF	7.2	12	F2	5.8993	5.7393	5.39095	5.00619	-0.265903	-0.389912	-0.349636	-0.265903	-0.496205	-0.307651
HF	7.2	12	P8	4.17766	3.80279	3.39333	2.64998	-0.879728	-0.849525	-0.844523	-0.879728	-0.823637	-0.839308
HF	7.2	12	T5	7.15985	6.862	6.26023	5.51493	-0.407839	-0.568544	-0.530583	-0.407839	-0.70629	-0.49101
HF	7.2	12	U2	4.22944	4.22799	4.28769	4.70787	-0.00334261	0.0623274	0.261246	-0.00334261	0.118616	0.468609
LF	8.1	13	E6	1.34224	1.36889	1.38545	1.38857	0.194652	0.145662	0.0797231	0.194652	0.103671	0.010985
LF	8.1	13	I9	6.49265	6.5319	6.56304	6.61113	0.0592667	0.0490616	0.0421465	0.0592667	0.0403144	0.0349379
LF	8.1	13	L3	13.6508	13.7026	13.7808	13.8724	0.0372144	0.0430989	0.0374894	0.0372144	0.0481429	0.0316417
LF	8.1	13	L8	3.90164	3.92015	3.94106	3.95829	0.0465225	0.0457241	0.0335347	0.0465225	0.0450398	0.0208277
LF	8.1	13	U6	6.18447	6.18947	6.18947	6.3008	0.00793715	0.00366206	0.0434419	0.00793715	-2.2985e-06	0.0849106
LF	8.1	13	W1	2.78958	2.79334	2.79933	2.78943	0.0132086	0.0158058	-0.000128007	0.0132086	0.0180319	-0.0167382
LF	8.1	14	C4	13.3733	13.3822	13.3736	13.3555	0.00653858	0.000111927	-0.00308193	0.00653858	-0.00539663	-0.00641137
LF	8.1	14	G3	2.57441	2.5812	2.58367	2.58441	0.0258591	0.0162713	0.00897032	0.0258591	0.00805325	0.00135938
LF	8.1	14	G6	4.90547	4.91495	4.92634	4.94557	0.0189613	0.0192574	0.0188832	0.0189613	0.0195112	0.0184931
LF	8.1	14	I6	2.25657	2.3861	2.48318	2.53347	0.562767	0.454388	0.283389	0.562767	0.361492	0.105131
LF	8.1	14	U7	4.98626	5.00082	5.02273	5.00646	0.0286315	0.0331022	0.00935638	0.0286315	0.0369343	-0.0153975
LF	8.1	14	W4	8.95424	8.96127	8.96823	8.97252	0.00769944	0.00707079	0.00471309	0.00769944	0.00653195	0.0022553
LF	8.1	14	X3	5.99675	6.04856	6.07632	6.10188	0.0847096	0.0600416	0.0404888	0.0847096	0.0388975	0.020106
LF	8.1	15	G1	5.61869	5.62636	5.64216	5.67128	0.0133888	0.0189042	0.0216157	0.0133888	0.0236317	0.0244424
LF	8.1	15	G8n	4.95652	4.95646	4.95644	4.88209	-0.000109594	-7.04356e-05	-0.0346784	-0.000109594	-3.68712e-05	-0.0707557
LF	8.1	15	H2	1.19289	1.20375	1.25904	1.36283	0.0892512	0.250897	0.329005	0.0892512	0.389451	0.410429
LF	8.1	15	I2	3.78362	3.79683	3.85443	3.94006	0.0342263	0.0846838	0.0954934	0.0342263	0.127933	0.106762
LF	8.1	15	T6	10.6605	10.6647	10.6701	10.6718	0.00390083	0.004071	0.00245488	0.00390083	0.00421686	0.000770151
LF	8.1	15	U8	5.77318	5.80019	5.82856	5.86884	0.0458659	0.0434051	0.0382687	0.0458659	0.0412957	0.0329142
LF	7.8	16	B8	16.6423	16.6058	16.5866	16.5629	-0.0214639	-0.0151389	-0.0110171	-0.0214639	-0.00971748	-0.00672023
LF	7.8	16	H1	1.93314	1.96016	2.01354	2.13035	0.136984	0.188178	0.235593	0.136984	0.232059	0.285021
LF	7.8	16	J1	5.41491	5.49515	5.54749	5.77503	0.145266	0.110787	0.153591	0.145266	0.0812339	0.198212
LF	7.8	16	J4	1.90092	1.90093	1.91494	1.97888	4.66026e-05	0.0333835	0.0947124	4.66026e-05	0.061958	0.158645
LF	7.8	16	U4	10.0001	10.0232	10.0338	10.076	0.0226806	0.0152464	0.0175362	0.0226806	0.00887418	0.0199232
LF	7.8	16	Y1	1.62627	1.63438	1.64122	1.74013	0.0488559	0.0415869	0.161681	0.0488559	0.0353563	0.286874
LF	7.8	17	C8	4.21292	4.21029	4.21837	4.23478	-0.0061289	0.00585243	0.0119817	-0.0061289	0.0161221	0.0183711
LF	7.8	17	H9	1.76283	1.76215	1.76156	1.83854	-0.00378188	-0.00325694	0.0991879	-0.00378188	-0.00280699	0.205982
LF	7.8	17	J2	4.94001	5.00673	5.02413	5.09279	0.132423	0.0770517	0.0714279	0.132423	0.029591	0.0655654
LF	7.8	17	M2	3.3196	3.33506	3.3445	3.39143	0.0456637	0.0339402	0.0499726	0.0456637	0.0238915	0.0666856
LF	7.8	17	U9	4.97777	4.98167	4.98937	5.00656	0.00766526	0.0105445	0.0133539	0.00766526	0.0130125	0.0162825
LF	7.8	17	W6	2.49721	2.49591	2.49508	2.50529	-0.00513716	-0.00387378	0.00746759	-0.00513716	-0.00279088	0.0192904
LF	7.8	17	X8n	1.21448	1.40717	1.42607	1.57116	1.55548	0.788327	0.678264	1.55548	0.130764	0.563528
LF	7.8	18	H5	2.24082	2.25583	2.27738	2.35556	0.0656683	0.0738282	0.118259	0.0656683	0.0808224	0.164575
LF	7.8	18	J3	9.80717	9.79569	9.79146	9.80673	-0.0114833	-0.00725054	-0.000103583	-0.0114833	-0.00362245	0.00734678
LF	7.8	18	J5	4.65388	4.65281	4.65654	4.72517	-0.00225545	0.00258698	0.0353764	-0.00225545	0.00673764	0.0695578
LF	7.8	18	J6	5.52068	5.63085	5.73742	5.86263	0.19565	0.177648	0.143047	0.19565	0.162218	0.106976
LF	7.8	18	W3	3.91313	3.92429	3.93986	4.03246	0.0279573	0.0309018	0.0704215	0.0279573	0.0334256	0.111619
LF	7.8	18	X7	2.17383	2.1793	2.18529	2.21742	0.0246785	0.0238592	0.0463139	0.0246785	0.023157	0.0697218
LF	7.5	19	E4n	9.82244	10.8354	11.0703	10.6272	1.011	0.574828	0.189217	1.011	0.200967	-0.212765
LF	7.5	19	I4	2.63491	2.64691	2.65753	2.69751	0.0446611	0.038835	0.0548688	0.0446611	0.0338412	0.0715832
LF	7.5	19	K1	5.46607	5.461	5.44761	5.49849	-0.00909151	-0.015281	0.0137008	-0.00909151	-0.0205862	0.0439129
LF	7.5	19	K3	2.61712	2.58801	2.5921	2.65877	-0.109062	-0.0432567	0.0367505	-0.109062	0.0131478	0.120154
LF	7.5	19	W2	4.06421	3.98174	3.93769	3.94956	-0.198954	-0.140863	-0.0651496	-0.198954	-0.0910707	0.0137779
LF	7.5	19	W7	3.2239	3.26939	3.33785	3.45378	0.138325	0.15993	0.164675	0.138325	0.178449	0.169622
LF	7.5	20	E7	4.2521	4.12662	4.05626	3.93799	-0.289297	-0.208394	-0.170605	-0.289297	-0.13905	-0.13121
LF	7.5	20	H3	1.46325	1.47592	1.47846	1.52748	0.0848621	0.047047	0.101383	0.0848621	0.0146341	0.158025
LF	7.5	20	J9	6.79177	6.65397	6.55785	6.4364	-0.198912	-0.155844	-0.120839	-0.198912	-0.118928	-0.0843475
LF	7.5	20	K2	3.65328	3.64608	3.63425	3.66377	-0.0193359	-0.0235711	0.0066311	-0.0193359	-0.0272013	0.0381155
LF	7.5	20	W5	4.02858	3.98787	4.02991	4.02347	-0.0990676	0.00149016	-0.00292922	-0.0990676	0.0876825	-0.00753622
LF	7.5	20	O6	1.03476	1.05316	1.05169	1.10061	0.174279	0.0740131	0.146961	0.174279	-0.0119288	0.223007
LF	7.5	20	Y3	1.4877	1.4956	1.54515	1.72717	0.0520453	0.174717	0.371747	0.0520453	0.279864	0.577142
LF	7.5	21	I3	4.64682	4.63549	4.62557	4.58209	-0.0239029	-0.0206969	-0.0321709	-0.0239029	-0.0179489	-0.0441319
LF	7.5	21	J7	9.0742	9.00162	8.94693	8.88653	-0.0784235	-0.0634633	-0.0477635	-0.0784235	-0.0506403	-0.0313972
LF	7.5	21	J8	5.2787	5.24084	5.22349	5.1826	-0.0703099	-0.0473231	-0.0420432	-0.0703099	-0.0276201	-0.0365392
LF	7.5	21	M3	1.78037	1.7818	1.76725	1.75019	0.00788323	-0.0333483	-0.0391451	0.00788323	-0.0686896	-0.0451879
LF	7.5	21	X5	2.8028	2.75542	2.72303	2.67488	-0.165747	-0.128784	-0.105408	-0.165747	-0.0971016	-0.0810386
LF	7.5	21	Y5	2.49163	2.43061	2.39168	2.33725	-0.240095	-0.181504	-0.143093	-0.240095	-0.131282	-0.103051
LF	7.2	22	B2	14.7015	13.7275	12.7295	11.4122	-0.649529	-0.606941	-0.516713	-0.649529	-0.570437	-0.422654
LF	7.2	22	K9	3.84795	3.6387	3.37118	3.15334	-0.533138	-0.560647	-0.416894	-0.533138	-0.584225	-0.267038
LF	7.2	22	L2	0.614731	0.639628	0.633337	0.640727	0.397075	0.136956	0.0976638	0.397075	-0.0860033	0.0567036
LF	7.2	22	L7	3.26196	3.21847	3.11778	3.01965	-0.130694	-0.199994	-0.171555	-0.130694	-0.259395	-0.141908
LF	7.2	22	X4	4.3355	3.91829	3.43914	2.31193	-0.943457	-0.935522	-1.07793	-0.943457	-0.928721	-1.22639
LF	7.2	22	Y9	0.967182	0.980481	0.935634	1.03158	0.134812	-0.147595	0.153764	0.134812	-0.389658	0.467917
LF	7.2	23	A8	10.1564	9.60487	8.96036	8.14342	-0.532432	-0.532879	-0.457742	-0.532432	-0.533262	-0.379416
LF	7.2	23	I5	1.4406	1.39116	1.34684	1.44653	-0.336497	-0.294505	0.00949987	-0.336497	-0.258512	0.32641
LF	7.2	23	K6	6.72212	6.5364	6.26109	5.93726	-0.270866	-0.310338	-0.269649	-0.270866	-0.344171	-0.227232
LF	7.2	23	L5n	4.6196	3.62973	3.52231	3.32916	-2.10074	-1.07479	-0.645124	-2.10074	-0.195403	-0.197216
LF	7.2	23	W8	4.57767	4.44957	4.27107	4.0586	-0.27434	-0.303066	-0.261875	-0.27434	-0.327688	-0.218936
LF	7.2	23	X9	2.1947	2.00746	1.70931	1.37571	-0.836414	-1.00074	-0.861819	-0.836414	-1.14159	-0.717
LF	7.2	23	Y7	1.58394	1.54277	1.49958	1.50764	-0.254829	-0.241012	-0.11125	-0.254829	-0.229168	0.02402
LF	7.2	24	H6	4.33188	4.30612	4.26847	3.91169	-0.058306	-0.0662361	-0.224018	-0.058306	-0.0730333	-0.388497
LF	7.2	24	K4	3.8202	3.70952	3.55323	3.32067	-0.284049	-0.316215	-0.301985	-0.284049	-0.343786	-0.287152
LF	7.2	24	K5	4.17834	4.07324	3.86982	3.53308	-0.24661	-0.334118	-0.356655	-0.24661	-0.409125	-0.380149
LF	7.2	24	M4	4.24326	4.18982	4.08731	3.95061	-0.123474	-0.166299	-0.159281	-0.123474	-0.203006	-0.151966
LF	7.2	24	X6	6.91215	6.79773	6.64892	6.4308	-0.16229	-0.172322	-0.160827	-0.16229	-0.180922	-0.148844
LF	7.2	24	Y8	6.40427	6.14259	5.8668	5.44949	-0.40059	-0.379741	-0.344306	-0.40059	-0.361871	-0.307366

## Sheet: DISSOLUTION
	DEATHS
		Treatment
		HF 7.2	3
		LF 7.2	3
		LF 8.1	1
		Total
	DISSOLUTION
		N CORALS		152
		N Corals negative growth		48
		% Corals affected		31.5789
			pH	N	% affected
		HF	8.1	0	0
			7.8	2	10.5263
			7.5	5	26.3158
			7.2	15	78.9474
		LF	8.1	1	5.26316
			7.8	1	5.26316
			7.5	8	42.1053
			7.2	13	68.4211
		TOTAL		45	29.6053
